# Supplementary material for: 2D–3D graphene-coated diatomite as a support toward growing ZnO for advanced photocatalytic degradation of methylene blue
Source: Royal Society of Chemistry journal article supplement (doi:10.1039/d1ra07708b), 2021-01-01
Supplement: d1ra07708b1.pdf [file d1ra07708b1.pdf]

# **2D-3D magnetic NiFe layered double hydroxide decorated biotemplate as bifunctional material for simultaneously anionic and cationic dyes adsorption**

Xingjian Dai<sup>1</sup>, Hao Zeng<sup>2</sup>, Chuan Jin<sup>3</sup>, Jinsong Rao<sup>4</sup>, Xiaoying Liu<sup>5</sup>, Kailin Li<sup>6</sup>, Yifan Zhang<sup>7</sup>, Yaolun Yu<sup>8</sup>, Yuxin Zhang<sup>9</sup>\*

*1 College of Materials Science and Engineering, Chongqing University, Chongqing, PR China 400044; Daixingjian@cqu.edu.cn*

*2 College of Materials Science and Engineering, Chongqing University, Chongqing, PR China 400044; 1196942050@qq.com*

*3 College of Materials Science and Engineering, Chongqing University, Chongqing, PR China 400044; 2972513971@qq.com*

*4 College of Materials Science and Engineering, Chongqing University, Chongqing, PR China 400044; likailin920809@163.com*

*5 Qian Xuesen Laboratory of Space Technology, China Academy of Space Technology, Beijing, 100094, China; yuyaolun@qxslab.cn*

*6 College of Materials Science and Engineering, Chongqing University, Chongqing, PR China 400044; zhangyuxin@cqu.edu.cn*

*\*Correspondence: E-mail: zhangyuxin@cqu.edu.cn; Tel: 862365104131*

## Supporting information

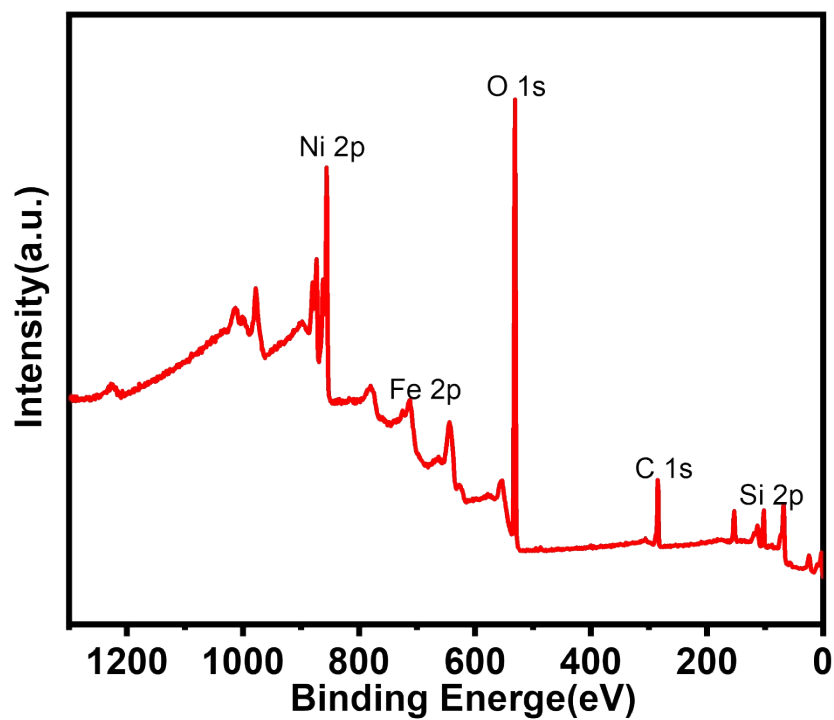

Fig.S1. XPS survey spectrum of DE@Ni<sub>4</sub>Fe<sub>1</sub> LDH

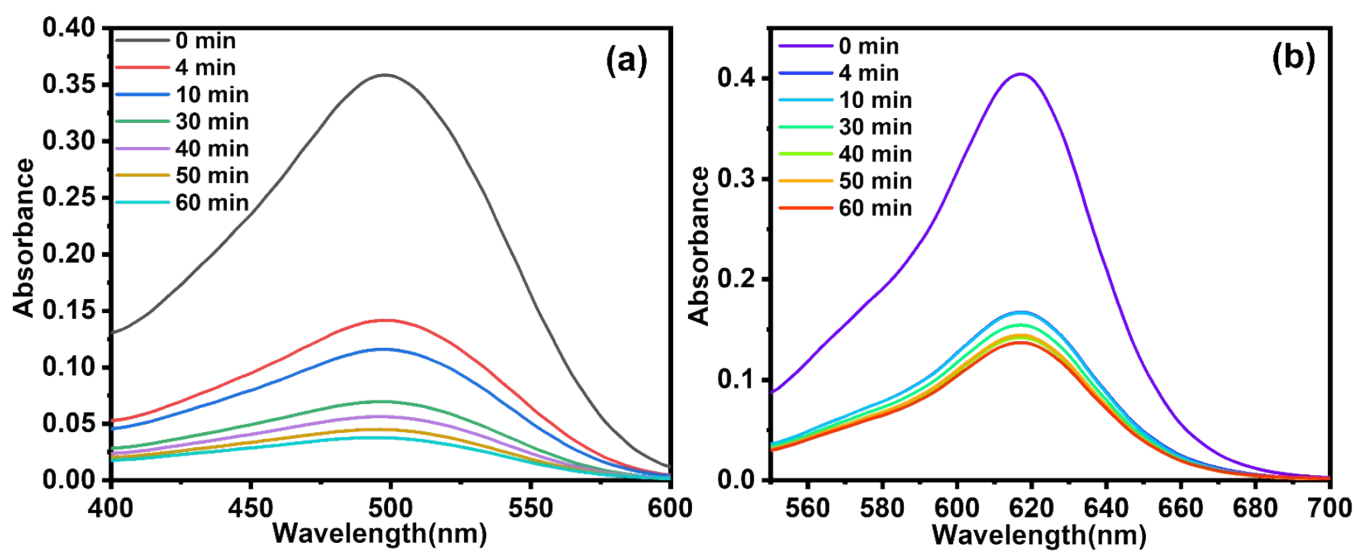

**Fig.S2.** UV-Vis absorption spectra of 20 mg L<sup>-1</sup> (a) congo red, (b) malachite green after adsorption by DE@Ni<sub>4</sub>Fe<sub>1</sub> LDH with different contact times.

**Table S1. Characterization data of the as-synthesized DE@NiFe LDH.**

| <b>Sample</b>                      | <b>d<sub>(003)</sub> (nm)</b> | <b>d<sub>(110)</sub> (nm)</b> | <b>c (nm)</b> | <b>a (nm)</b> | <b><math>\sigma</math>(nm<sup>2</sup>)</b> |
|------------------------------------|-------------------------------|-------------------------------|---------------|---------------|--------------------------------------------|
| DE@Ni <sub>2</sub> Fe <sub>1</sub> | 0.755                         | 0.154                         | 2.266         | 0.307         | 0.041                                      |
| DE@Ni <sub>3</sub> Fe <sub>1</sub> | 0.764                         | 0.154                         | 2.291         | 0.307         | 0.027                                      |
| DE@Ni <sub>4</sub> Fe <sub>1</sub> | 0.771                         | 0.1354                        | 2.312         | 0.307         | 0.020                                      |
